# Supplementary material for: FeVO4 porous nanorods for electrochemical nitrogen reduction: contribution of the Fe2c–V2c dimer as a dual electron-donation center
Source: Royal Society of Chemistry journal article supplement (doi:10.1039/d0cc04100a), 2020-01-01
Supplement: d0cc04100a1.pdf [file d0cc04100a1.pdf]

## Experimental Section

### *Synthesis of FeVO<sub>4</sub> porous nanorods*

All the chemicals are of analytical grade and used as received. Briefly, 0.1 M Fe(NO<sub>3</sub>)<sub>3</sub>·6H<sub>2</sub>O was dissolved in 30 mL de-ionized water, to which 0.1 M NH<sub>4</sub>VO<sub>3</sub> was added under magnetic stirring. The mixed solution was sealed in a Teflon-lined stainless steel autoclave and maintained in the oven at 160 °C for 3 h. The resulting precipitates were collected via centrifugation and further washed with distilled water and ethanol several times. After that, the dried precipitates were placed in a muffle furnace and calcined in air at 500 °C for 6 h to obtain FeVO<sub>4</sub> porous nanorods.

### *Characterizations*

X-ray diffraction (XRD) pattern was recorded on a Rigaku D/max 2400 diffractometer. Transmission electron microscopy (TEM), high-resolution transmission electron microscopy (HRTEM) were performed on a Tecnai G<sup>2</sup> F20 microscope. X-ray photoelectron spectroscopy (XPS) analysis was conducted on a PHI 5702 spectrometer. Nitrogen adsorption/desorption isotherms were recorded on an ASAP 2020 instrument. <sup>1</sup>H nuclear magnetic resonance (NMR) measurements were performed on a 500 MHz Bruker superconducting-magnet NMR spectrometer. Prior to NMR measurements, all the feeding gases were respectively purified by an acid trap (0.05 M H<sub>2</sub>SO<sub>4</sub>) to eliminate the potential NO<sub>x</sub> and NH<sub>3</sub> contaminants[1].

### *Electrochemical measurements*

Electrochemical measurements were conducted on a CHI-660E electrochemical workstation using a three-electrode system consisting of counter electrode (graphite

rod), working electrode (CC sample) and reference electrode (Ag/AgCl). All potentials were referenced to a reversible hydrogen electrode (RHE) by  $E_{\text{RHE}} \text{ (V)} = E_{\text{Ag/AgCl}} + 0.197 + 0.059 \times \text{pH}$ . The CC ( $1 \times 1 \text{ cm}^2$ ) was pretreated by soaking it in 0.5 M  $\text{H}_2\text{SO}_4$  for 12 h, and then washed with deionized water several times and dried at 60 °C for 24 h. The working electrode was fabricated by depositing 20  $\mu\text{L}$  of the catalyst ink onto the pretreated CC ( $0.2 \text{ mg cm}^{-2}$ ) and dried in the air. The catalyst ink was fabricated by ultrasonically dispersing 1 mg of the catalyst in 100  $\mu\text{L}$  of ethyl alcohol containing 5  $\mu\text{L}$  of Nafion (5 wt%). The NRR tests were carried out in an H-type two-compartment electrochemical cell separated by a Nafion 211 membrane [2-4]. The Nafion membrane was pretreated by boiling it in 5%  $\text{H}_2\text{O}_2$  solution for 1 h, 0.5 M  $\text{H}_2\text{SO}_4$  for 1 h and deionized water for 1 h in turn. During each electrolysis, ultra-high-purity  $\text{N}_2$  gas (99.999%) was continuously purged into the cathodic chamber at a flow rate of  $20 \text{ mL min}^{-1}$ . After each NRR electrolysis, the produced  $\text{NH}_3$  and possible  $\text{N}_2\text{H}_4$  were quantitatively determined by the indophenol blue method[5], and approach of Watt and Chrisp[6], respectively.

### ***Determination of $\text{NH}_3$***

Typically, 4 mL of electrolyte was removed from the electrochemical reaction vessel. Then 50  $\mu\text{L}$  of solution containing NaOH (0.75 M) and NaClO ( $\rho_{\text{Cl}} = \sim 4.5$ ), 500  $\mu\text{L}$  of solution containing 0.32 M NaOH, 0.4 M  $\text{C}_7\text{H}_6\text{O}_3\text{Na}$ , and 50  $\mu\text{L}$  of  $\text{C}_5\text{FeN}_6\text{Na}_2\text{O}$  solution (1 wt%) were respectively added into the electrolyte. After standing for 2 h, the UV-vis absorption spectrum was measured and the concentration-absorbance curves were calibrated by the standard  $\text{NH}_4\text{Cl}$  solution with

a series of concentrations.

NH<sub>3</sub> yield was calculated by the following equation:

$$\text{NH}_3 \text{ yield } (\mu\text{g h}^{-1} \text{ mg}_{\text{cat}}^{-1}) = \frac{c_{\text{NH}_3} \times V}{t \times m} \quad (1)$$

Faradaic efficiency was calculated by the following equation:

$$\text{Faradaic efficiency (\%)} = \frac{3 \times F \times c_{\text{NH}_3} \times V}{17 \times Q} \times 100\% \quad (2)$$

where  $c_{\text{NH}_3}$  ( $\mu\text{g mL}^{-1}$ ) is the measured NH<sub>3</sub> concentration,  $V$  (mL) is the volume of the electrolyte,  $t$  (h) is the reduction time and  $m$  (mg) is the mass loading of the catalyst on CC.  $F$  ( $96500 \text{ C mol}^{-1}$ ) is the Faraday constant,  $Q$  (C) is the quantity of applied electricity.

### ***Determination of N<sub>2</sub>H<sub>4</sub>***

Typically, 5 mL of electrolyte was removed from the electrochemical reaction vessel. The 330 mL of color reagent containing 300 mL of ethyl alcohol, 5.99 g of C<sub>9</sub>H<sub>11</sub>NO and 30 mL of HCl were prepared, and 5 mL of color reagent was added into the electrolyte. After stirring for 10 min, the UV-vis absorption spectrum was measured and the concentration-absorbance curves were calibrated by the standard N<sub>2</sub>H<sub>4</sub> solution with a series of concentrations.

### ***Calculation details***

DFT computations were carried out by using the Cambridge sequential total energy package (CASTEP)[7]. The projector augmented wave (PAW) pseudopotential with the Perdew–Burke–Ernzerhof (PBE) exchange-correlation function was utilized in the calculations. To ensure all atoms were fully relaxed for

each system, the convergence tolerance was set as  $1.0 \times 10^{-5}$  eV for energy and 0.02 eV  $\text{\AA}^{-1}$  for force. The  $4 \times 4 \times 1$  Monkhorst-Pack mesh was used in Brillouin zone sampling. The kinetic cutoff energy for the plane wave basis was set at 500 eV. The  $\text{FeVO}_4$  (120) slab was modeled by a  $2 \times 2$  supercell and a vacuum region of 15  $\text{\AA}$  was used to separate adjacent slabs. To sufficiently consider the on-site Columbic repulsion between the d electrons, the Hubbard  $U$  corrections were applied to transition metal d-electrons and the values of  $U$ - $J$  parameters for Fe (2.0) and V (3.2) atoms were adopted [8].

The Gibbs free energy ( $\Delta G$ , 298 K) of reaction steps is calculated by [9]:

$$\Delta G = \Delta E + \Delta \text{ZPE} - T\Delta S \quad (3)$$

where  $\Delta E$  is the adsorption energy,  $\Delta \text{ZPE}$  is the zero point energy difference and  $T\Delta S$  is the entropy difference between the gas phase and adsorbed state. The entropies of free gases were acquired from the NIST database.

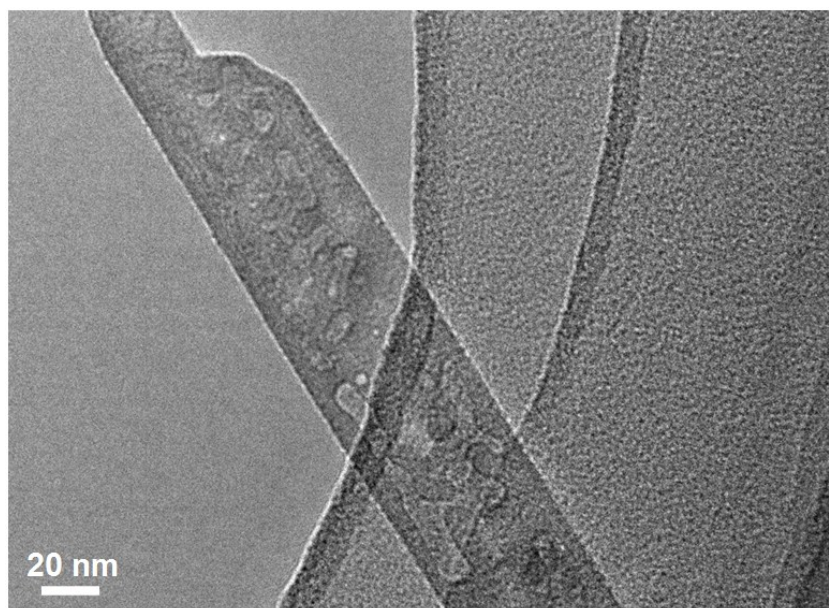

Fig. S1. TEM image of FeVO<sub>4</sub> PNRs.

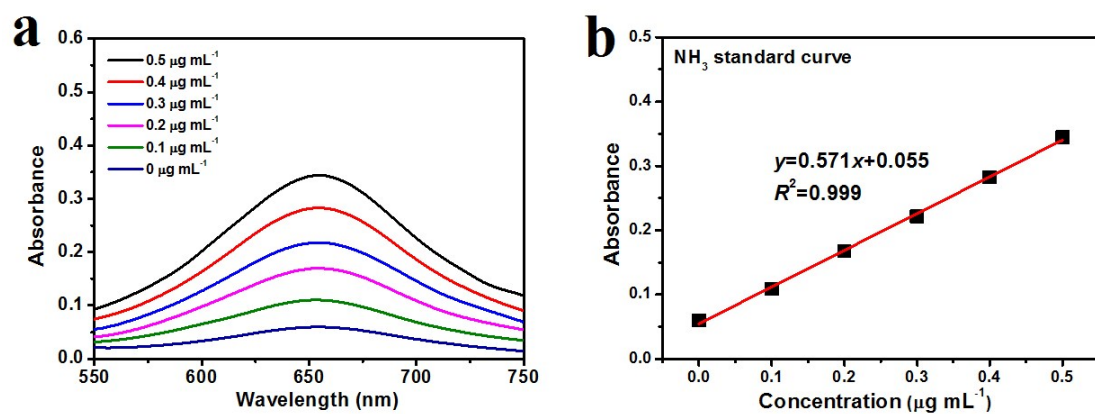

Fig. S2. (a) UV-Vis absorption spectra of indophenol assays with  $\text{NH}_4\text{Cl}$  after incubated for 2 h at ambient conditions. (b) Calibration curve used for calculation of  $\text{NH}_3$  concentrations.

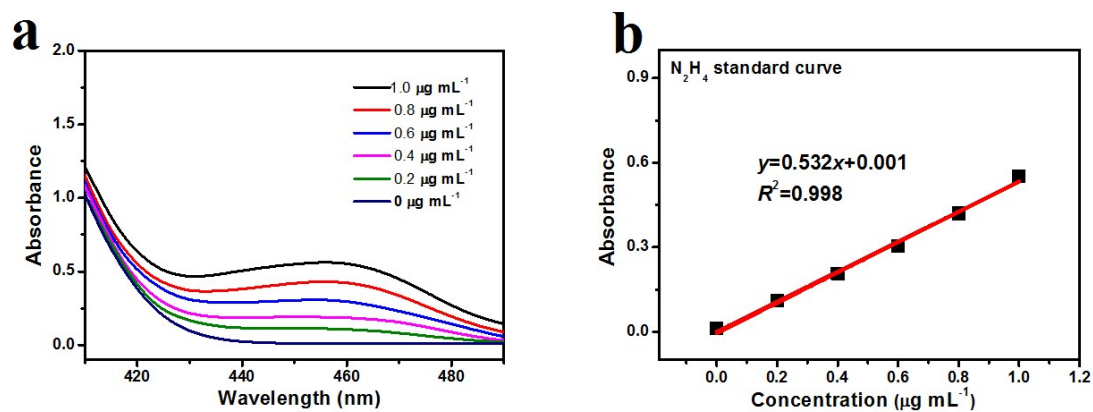

Fig. S3. (a) UV-Vis absorption spectra of  $\text{N}_2\text{H}_4$  assays after incubated for 20 min at ambient conditions. (b) Calibration curve used for calculation of  $\text{N}_2\text{H}_4$  concentrations.

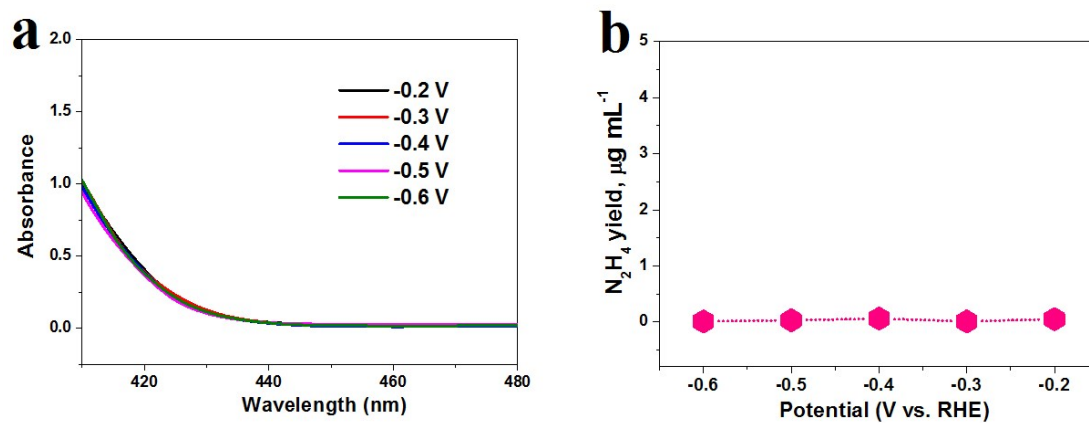

Fig. S4. (a) UV-Vis spectra of the electrolytes (stained with the chemical indicator based on the method of Watt and Chrisp) after 2 h of electrocatalysis on FeVO<sub>4</sub> PNRs at various potentials, and (b) corresponding N<sub>2</sub>H<sub>4</sub> concentrations in the electrolytes.



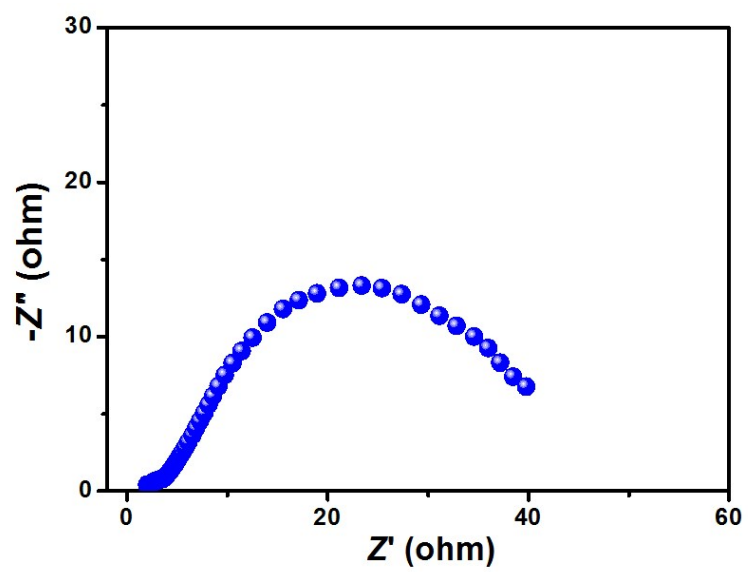

Fig. S5. Electrochemical impedance spectra of FeVO<sub>4</sub> PNRs.

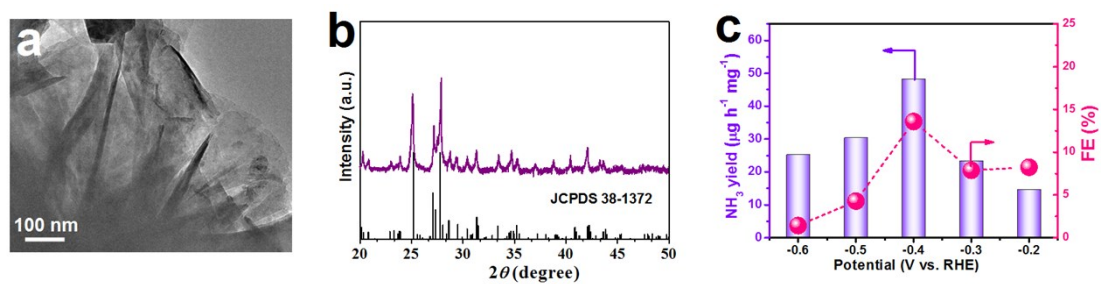

Fig. S6. (a) TEM image of FeVO<sub>4</sub> nanosheets prepared by a reported method[10]. (b) XRD pattern of FeVO<sub>4</sub> nanosheets. (c) NH<sub>3</sub> yield/FE data of FeVO<sub>4</sub> nanosheets.

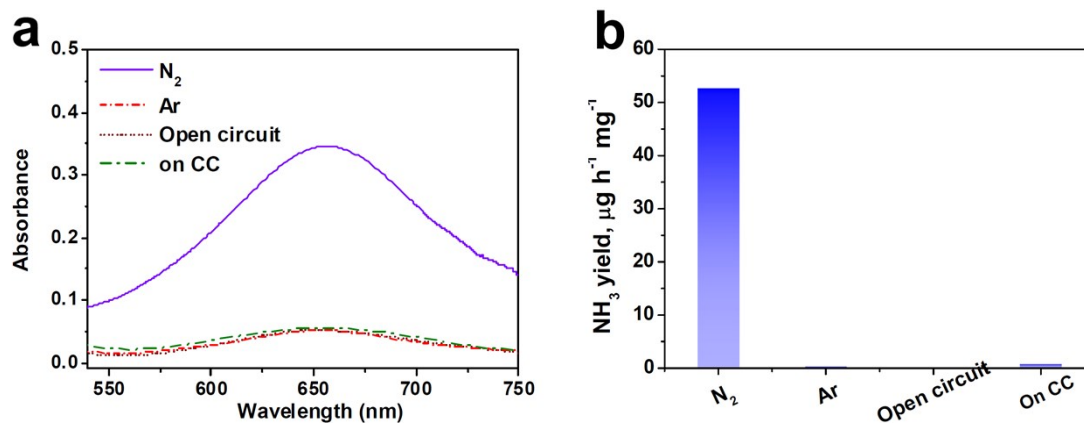

Fig. S7. (a) UV-Vis absorption spectra of the electrolytes stained with indophenol indicator after 2 h electrolysis on  $FeVO_4$  PNRs at -0.4 V in  $N_2$ -saturated solution, Ar-saturated solutions,  $N_2$ -saturated solution at open circuit and  $N_2$ -saturated solution on pristine CC, and (b) corresponding  $NH_3$  yields.

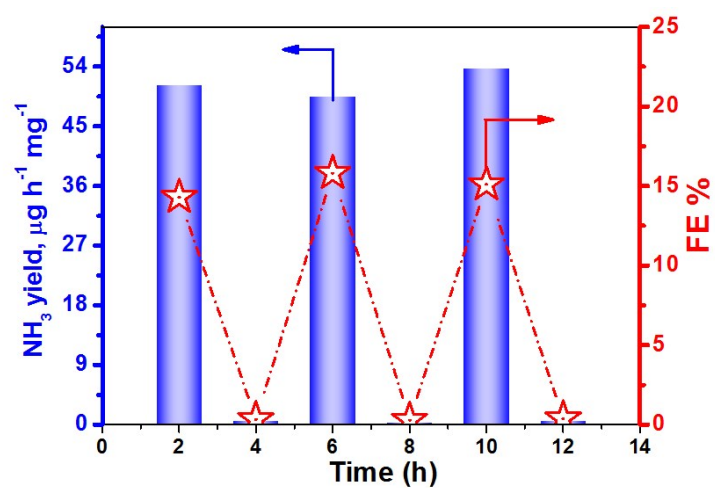

Fig. S8. Alternating cycling test of FeVO<sub>4</sub> PNRs by switching electrolysis between Ar-saturated and N<sub>2</sub>-saturated solutions for 12 h at -0.4 V.

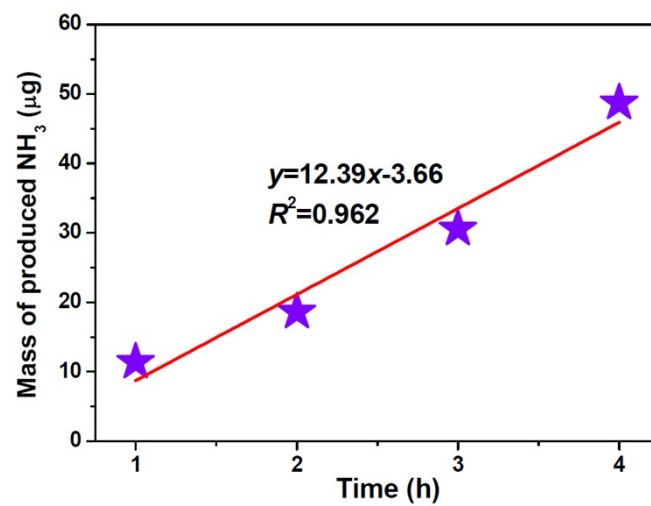

Fig. S9. Mass of produced  $\text{NH}_3$  after electrolysis at various times on  $\text{FeVO}_4$  PNRs.

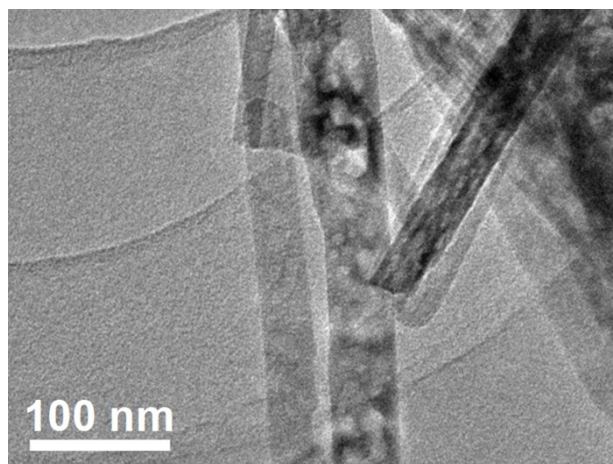

Fig. S10. TEM image of FeVO<sub>4</sub> PNRs after stability test.

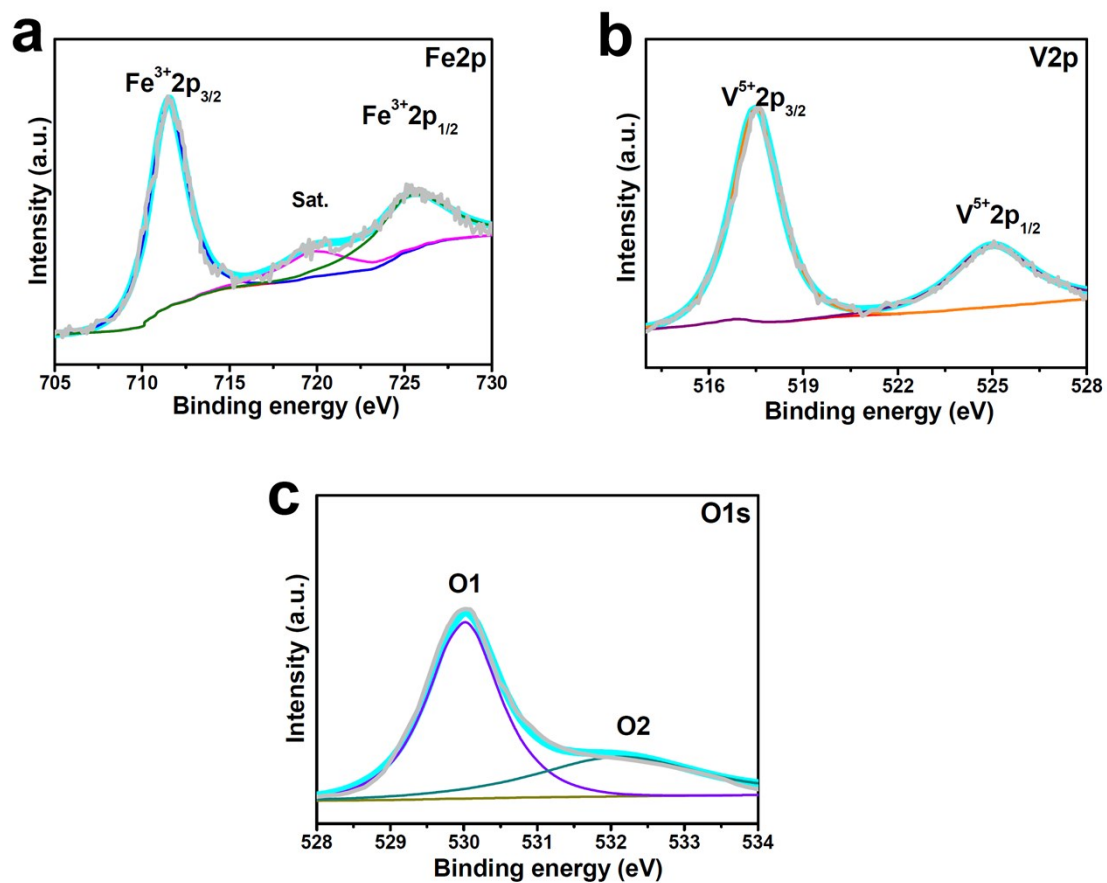

Fig. S11. XPS spectra of FeVO<sub>4</sub> PNRs (scraped down from CC) after stability test: (a) Fe2p; (b) V2p; (c) O1s.

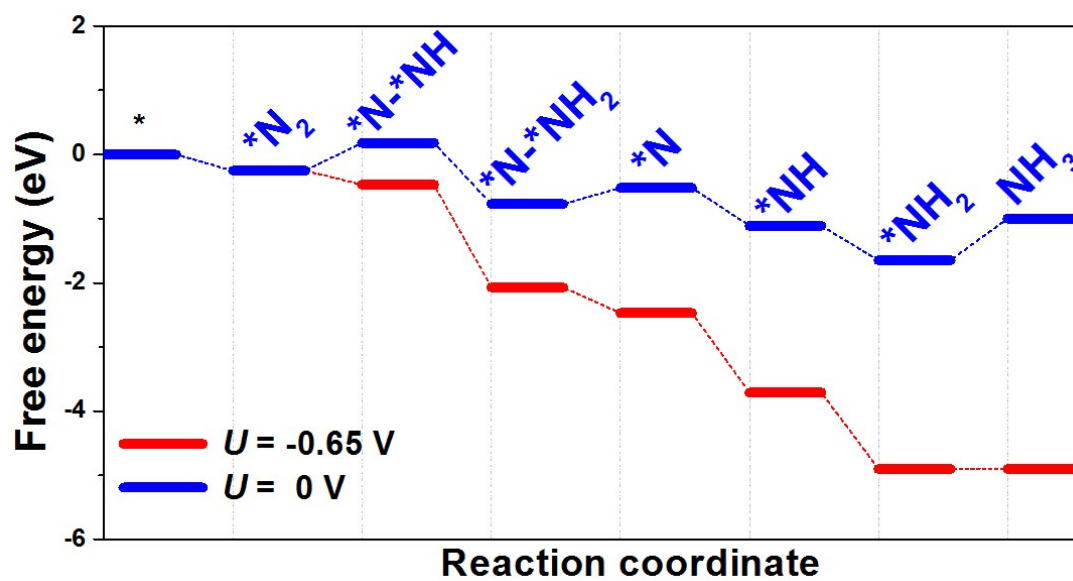

Fig. S12. Free energy diagrams of consecutive NRR pathway on  $Fe_{2c}-V_{2c}$  dimer at zero and applied energy of -0.65 V.



Table S1. Comparison of optimum NH<sub>3</sub> yield and Faradic efficiency (FE) for recently reported state-of-the-art NRR electrocatalysts at ambient conditions

| Catalyst                                                                    | Electrolyte                           | Determination method     | Optimum Potential (V Vs RHE) | NH <sub>3</sub> yield (μg h <sup>-1</sup> mg <sup>-1</sup> )  | FE (%)        | Ref. |
|-----------------------------------------------------------------------------|---------------------------------------|--------------------------|------------------------------|---------------------------------------------------------------|---------------|------|
| Bi <sub>4</sub> V <sub>2</sub> O <sub>11</sub> -CeO <sub>2</sub> nanofibers | 0.1 M HCl                             | Indophenol blue method   | -0.2                         | 23.21 μg h <sup>-1</sup> mg <sup>-1</sup>                     | 10.16         | [11] |
| CoP hollow nanocage                                                         | 1.0 M KOH                             | Indophenol blue method   | -0.4                         | 10.78 μg h <sup>-1</sup> mg <sup>-1</sup>                     | 7.36          | [12] |
| α-Fe nanorods                                                               | [C4mpyr] [eFAP]                       | Indophenol blue method   | -0.23                        | 2.35 × 10 <sup>-11</sup> mol s <sup>-1</sup> cm <sup>-2</sup> | 32            | [13] |
| Mo <sub>2</sub> C/C                                                         | 0.5 M Li <sub>2</sub> SO <sub>4</sub> | Nessler's reagent method | -0.3                         | 11.3 μg h <sup>-1</sup> mg <sup>-1</sup>                      | 7.8           | [14] |
| Ti <sub>3</sub> C <sub>2</sub> T <sub>x</sub> -MXene                        | 0.5 M Li <sub>2</sub> SO <sub>4</sub> | Nessler's reagent method | -0.1                         | 4.7 μg cm <sup>-2</sup> h <sup>-1</sup>                       | 5.78          | [15] |
| B <sub>4</sub> C nanosheet                                                  | 0.1 M HCl                             | Indophenol blue method   | -0.75                        | 26.57 μg h <sup>-1</sup> mg <sup>-1</sup>                     | 15.95         | [16] |
| Bi nanoparticles                                                            | 0.5 M K <sub>2</sub> SO <sub>4</sub>  | Indophenol blue method   | -0.6                         | 0.052 mmol cm <sup>-2</sup> h <sup>-1</sup>                   | 66            | [17] |
| S-doped carbon nanospheres                                                  | 0.1 M Na <sub>2</sub> SO <sub>4</sub> | Indophenol blue method   | -0.7                         | 19.07 μg h <sup>-1</sup> mg <sup>-1</sup>                     | 7.47          | [18] |
| Fe <sub>2</sub> O <sub>3</sub> -CNT                                         | 0.5 M KOH                             | Salicylate method        | -2                           | 0.649 μg cm <sup>-2</sup> h <sup>-1</sup>                     | 0.164         | [19] |
| Fe <sub>2</sub> O <sub>3</sub> nanorods                                     | 0.1 M Na <sub>2</sub> SO <sub>4</sub> | Indophenol blue method   | -0.8                         | 15.9 μg h <sup>-1</sup> mg <sup>-1</sup>                      | 0.94          | [20] |
| Fe/Fe <sub>3</sub> O <sub>4</sub>                                           | 0.1 M PBS                             | Indophenol blue method   | -0.3                         | 0.19 μg cm <sup>-2</sup> h <sup>-1</sup>                      | 8.29          | [21] |
| Spinel Fe <sub>3</sub> O <sub>4</sub> nanorods                              | 0.1 M Na <sub>2</sub> SO <sub>4</sub> | Indophenol blue method   | -0.4                         | 5.6 × 10 <sup>-11</sup> mol s <sup>-1</sup> cm <sup>-2</sup>  | 2.6           | [22] |
| β-FeOOH nanorods                                                            | 0.5 M LiClO <sub>4</sub>              | Indophenol blue method   | -0.75                        | 23.32 μg h <sup>-1</sup> mg <sup>-1</sup>                     | 6.7           | [23] |
| Fe <sub>3</sub> S <sub>4</sub> nanosheets                                   | 0.1 M HCl                             | Indophenol blue method   | -0.4                         | 75.4 μg h <sup>-1</sup> mg <sup>-1</sup>                      | 6.45          | [24] |
| FeS/MoS <sub>2</sub>                                                        | 0.1 M Na <sub>2</sub> SO <sub>4</sub> | Indophenol blue method   | -0.5                         | 8.45 μg cm <sup>-2</sup> h <sup>-1</sup>                      | 2.96          | [25] |
| FeMoO <sub>4</sub> nanorods                                                 | 0.5 M LiClO <sub>4</sub>              | Indophenol blue method   | -0.5                         | 45.8 μg h <sup>-1</sup> mg <sup>-1</sup>                      | 13.2 (-0.3 V) | [26] |
| FeMoN <sub>6</sub> single atom catalyst                                     | 0.25 M LiClO <sub>4</sub>             | Indophenol blue method   | -0.3                         | 14.95 μg h <sup>-1</sup> mg <sup>-1</sup>                     | 41.7 (-0.2 V) | [27] |
| Mo <sub>3</sub> Fe <sub>3</sub> C                                           | 1 M KOH                               | Indophenol blue method   | -0.05                        | 1.23 μg h <sup>-1</sup> mg <sup>-1</sup>                      | 27            | [28] |
| VN nanoparticles                                                            | Nafion                                | Nessler's                | -0.1                         | 3.31 × 10 <sup>-10</sup>                                      | 5.95          | [29] |

|                                     |                                       | reagent method         |      | mol s <sup>-1</sup> cm <sup>-2</sup>                          |      |           |
|-------------------------------------|---------------------------------------|------------------------|------|---------------------------------------------------------------|------|-----------|
| VN nanosheets                       | 0.1 M HCl                             | Indophenol blue method | -0.5 | 8.40 × 10 <sup>-11</sup> mol s <sup>-1</sup> cm <sup>-2</sup> | 2.25 | [30]      |
| Hollow VO <sub>2</sub> microspheres | 0.1 M Na <sub>2</sub> SO <sub>4</sub> | Indophenol blue method | -0.7 | 21.4 μg h <sup>-1</sup> mg <sup>-1</sup>                      | 3.97 | [31]      |
| V <sub>2</sub> O <sub>3</sub> /C    | 0.1 M Na <sub>2</sub> SO <sub>4</sub> | Indophenol blue method | -0.6 | 12.3 μg h <sup>-1</sup> mg <sup>-1</sup>                      | 7.28 | [32]      |
| FeVO <sub>4</sub> PNRs              | 0.5 M LiClO <sub>4</sub>              | Indophenol blue method | -0.4 | 52.8 μg h <sup>-1</sup> mg <sup>-1</sup>                      | 15.7 | This work |

## Supplementary references

- [1] B. Hu, M. Hu, L.C. Seefeldt, T.L. Liu, ACS Energy Lett. 4 (2019) 1053-1054.
- [2] K. Chu, J. Wang, Y.P. Liu, Q.Q. Li, Y.L. Guo, J. Mater. Chem. A 8 (2020) 7117-7124.
- [3] K. Chu, Y. Liu, Y. Chen, Q. Li, J. Mater. Chem. A 8 (2020) 5200-5208.
- [4] K. Chu, Q. Li, Y. Liu, J. Wang, Y. Cheng, Appl. Catal. B 267 (2020) 118693.
- [5] D. Zhu, L. Zhang, R.E. Ruther, R.J. Hamers, Nat. Mater. 12 (2013) 836.
- [6] G.W. Watt, J.D. Chrisp, Anal. Chem. 24 (1952) 2006-2008.
- [7] S.J. Clark, M.D. Segall, C.J. Pickard, P.J. Hasnip, M.I.J. Probert, K. Refson, M.C. Payne, Z. Kristallogr. 220 (2005) 567-570.
- [8] V.I. Anisimov, F. Aryasetiawan, A. Lichtenstein, J. Phys.- Condens. Mat. 9 (1997) 767.
- [9] A.A. Peterson, Energy Environ. Sci. 3 (2010) 1311-1315.
- [10] W. Wang, Y. Zhang, X. Huang, Y. Bi, J. Mater. Chem. A 7 (2019) 10949-10953.
- [11] C. Lv, C. Yan, G. Chen, Y. Ding, J. Sun, Y. Zhou, G. Yu, Angew. Chem. Int. Edit. 130 (2018) 6181-6184.
- [12] W. Guo, Z. Liang, J. Zhao, B. Zhu, K. Cai, R. Zou, Q. Xu, Small Methods 2 (2018) 1800204.
- [13] B.H. Suryanto, C.S. Kang, D. Wang, C. Xiao, F. Zhou, L.M. Azofra, L. Cavallo, X. Zhang, D.R. MacFarlane, ACS Energy Lett. 3 (2018) 1219-1224.
- [14] H. Cheng, L.X. Ding, G.F. Chen, L. Zhang, J. Xue, H. Wang, Adv. Mater. 30 (2018) 1803694.
- [15] Y.R. Luo, G.F. Chen, L. Ding, X.Z. Chen, L.X. Ding, H.H. Wang, Joule 3 (2019) 279-289.
- [16] W. Qiu, X.-Y. Xie, J. Qiu, W.-H. Fang, R. Liang, X. Ren, X. Ji, G. Cui, A.M. Asiri, G. Cui, Nat. Commun. 9 (2018) 3485.
- [17] Y.-C. Hao, Y. Guo, L.-W. Chen, M. Shu, X.-Y. Wang, T.-A. Bu, W.-Y. Gao, N. Zhang, X. Su, X. Feng, J.-W. Zhou, B. Wang, C.-W. Hu, A.-X. Yin, R. Si, Y.-W. Zhang, C.-H. Yan, Nat. Catal. 2 (2019) 448-456.
- [18] L. Xia, X. Wu, Y. Wang, Z. Niu, Q. Liu, T. Li, X. Shi, A.M. Asiri, X. Sun, Small Methods 3 (2018) 1800251.
- [19] S. Chen, S. Perathoner, C. Ampelli, C. Mebrahtu, D. Su, G. Centi, Angew. Chem. Int. Edit. 56 (2017) 2699-2703.
- [20] X. Xiang, Z. Wang, X. Shi, M. Fan, X. Sun, ChemCatChem 10 (2018) 4530-4535.
- [21] L. Hu, A. Khaniya, J. Wang, G. Chen, W.E. Kaden, X. Feng, ACS Catal. 8 (2018) 9312-9319.
- [22] Q. Liu, X. Zhang, B. Zhang, Y. Luo, G. Cui, F. Xie, X. Sun, Nanoscale 10 (2018) 14386-14389.
- [23] X. Zhu, Z. Liu, Q. Liu, Y. Luo, X. Shi, A.M. Asiri, Y. Wu, X. Sun, Chem. Commun. 54 (2018) 11332-11335.
- [24] X. Zhao, X. Lan, D. Yu, H. Fu, Z. Liu, T. Mu, Chem. Commun. 54 (2018) 13010-13013.

- [25] Y. Guo, Z. Yao, B.J.J. Timmer, X. Sheng, L. Fan, Y. Li, F. Zhang, L. Sun, *Nano Energy* 62 (2019) 282-288.
- [26] K. Chu, Q.Q. Li, Y.H. Cheng, Y.P. Liu, *ACS Appl. Mater. Inter.* 12 (2020) 11789-11796.
- [27] Y. Li, Q. Zhang, C. Li, H.-N. Fan, W.-B. Luo, H.-K. Liu, S.-X. Dou, *J. Mater. Chem. A* 7 (2019) 22242-22247.
- [28] B. Qin, Y. Li, Q. Zhang, G. Yang, H. Liang, F. Peng, *Nano Energy* 68 (2020) 104374.
- [29] X. Yang, J. Nash, J. Anibal, M. Dunwell, S. Kattel, E. Stavitski, K. Attenkofer, J.G. Chen, Y. Yan, B. Xu, *J. Am. Chem. Soc.* 140 (2018) 13387-13391.
- [30] R. Zhang, Y. Zhang, X. Ren, G. Cui, A.M. Asiri, B. Zheng, X. Sun, *ACS Sustain. Chem. Eng.* 6 (2018) 9545-9549.
- [31] Q. Liu, R. Zhang, H. Guo, L. Yang, Y. Wang, Z. Niu, H. Huang, H. Chen, L. Xia, T. Li, *ChemElectroChem* 6 (2019) 1014-1018.
- [32] R. Zhang, J. Han, B. Zheng, X. Shi, A.M. Asiri, X. Sun, *Inorg. Chem. Front.* 6 (2019) 391-395.
